# Supplementary material
Source: MDPI journal article supplement (https://www.mdpi.com/search?q=processes-07-00338)
Supplement: s001 [file processes-07-00338-s001.pdf]

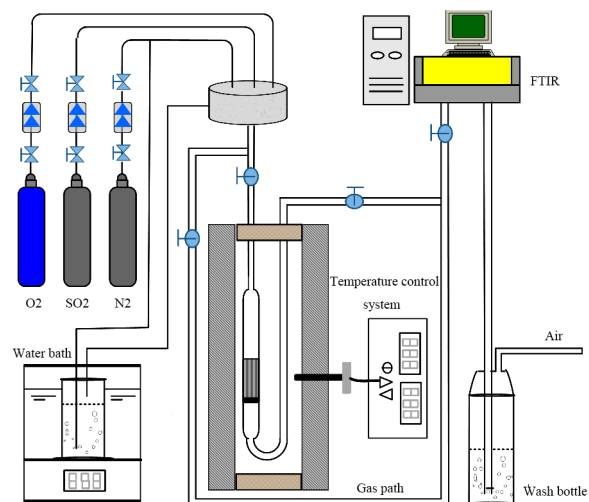

**Figure S1** Schematic figure of the fixed bed reactor system for SO<sub>2</sub> adsorption

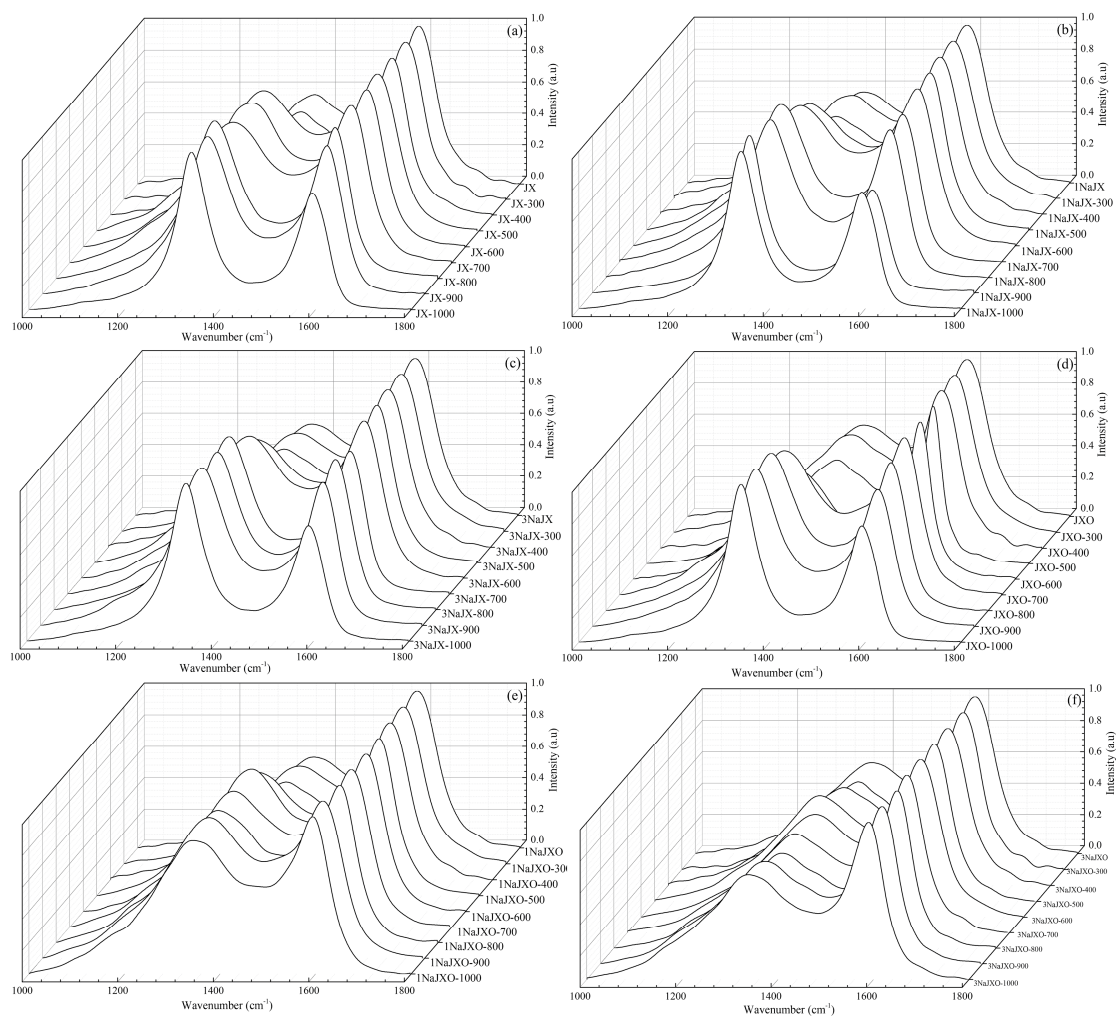

**Figure S2** Raman spectra from chars produced by different pyrolysis (a)JX; (b) 1NaJX; (c)3NaJX; (d) JXO; (e) 1NaJXO; (f) 3NaJXO.

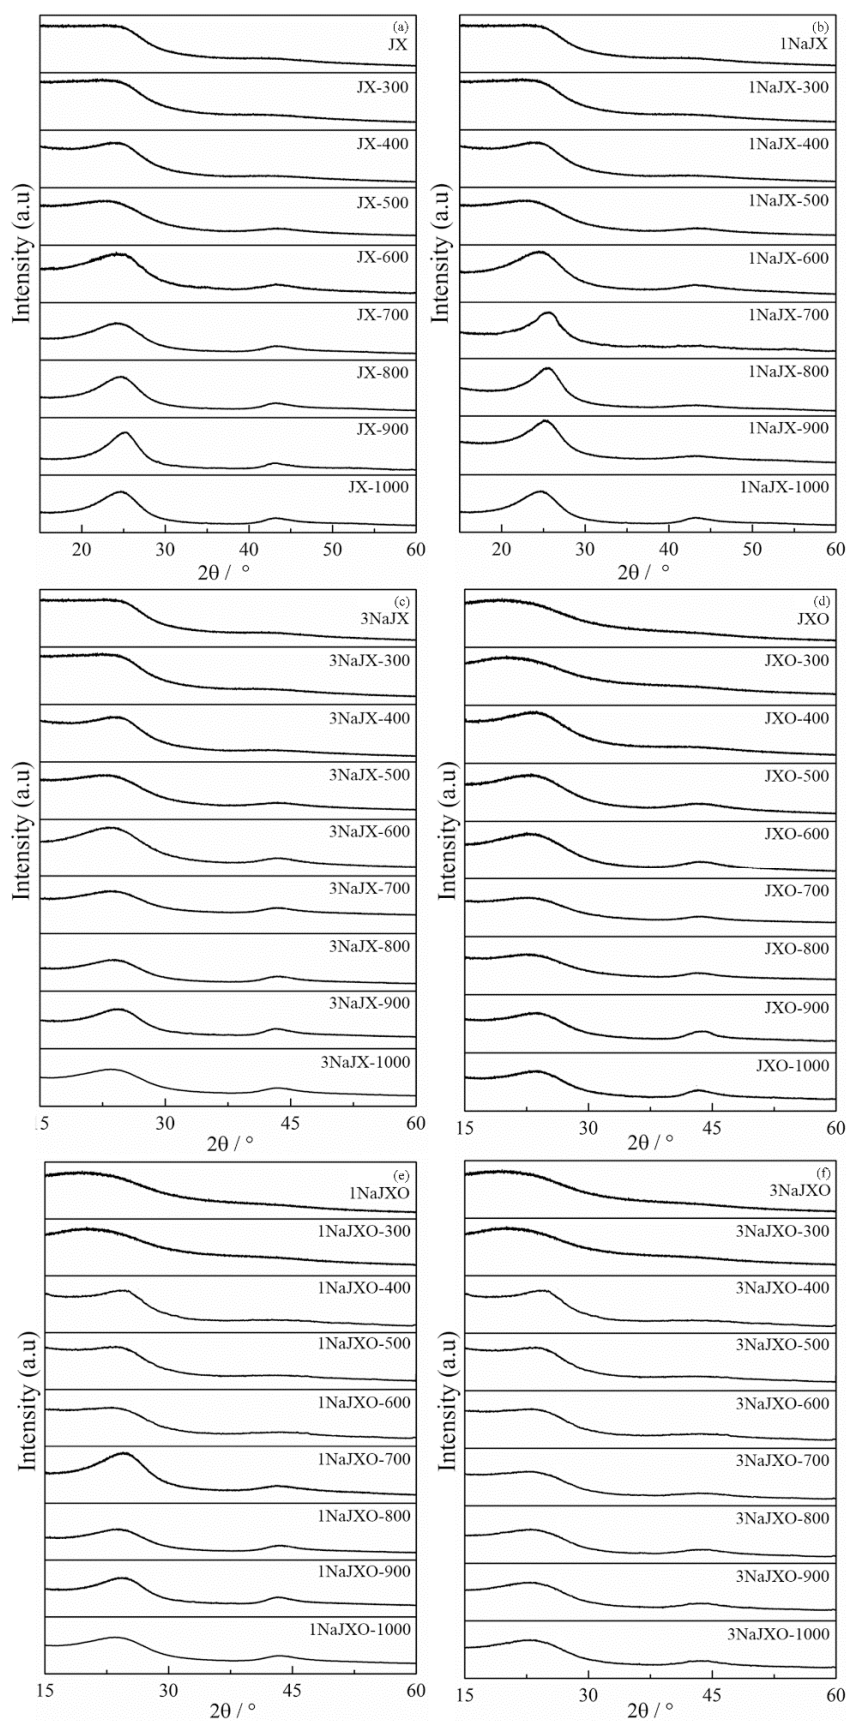

**Figure S3** XRD profiles from chars produced by different pyrolysis (a)JX; (b) 1NaJX; (c)3NaJX; (d) JXO; (e) 1NaJXO; (f) 3NaJXO.

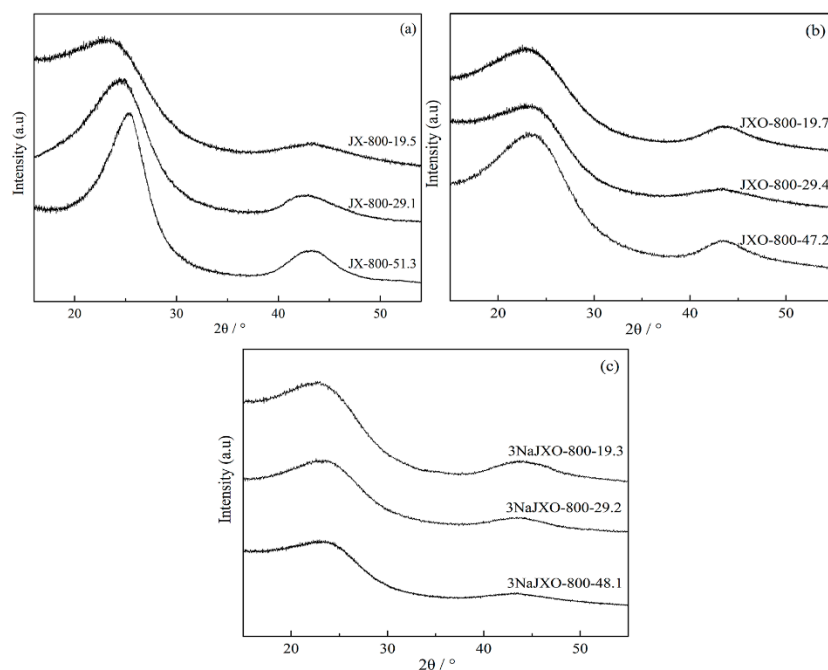

**Figure S4.** XRD profiles of coal chars at different burn offs during activation (a) JX-800 (b) JXO-800 (c) 3NaJXO-800

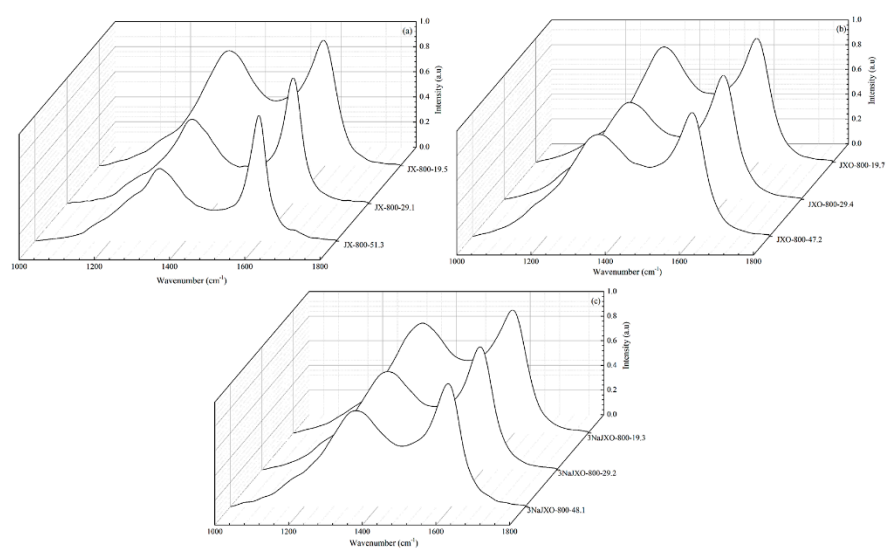

**Figure S5.** Raman spectra of coal chars at different burn offs during activation (a) JX-800 (b) JXO-800 (c) 3NaJXO-800
